# Supplementary material for: The impact of time interval on prognosis in patients with non-small cell lung cancer brain metastases after metastases surgery: a retrospective study
Source: Research Square preprint supplement (doi:10.21203/rs.3.rs-2998928/v1), 2023-06-26
Supplement: Supplementary file 1 [file 13f411ca1b8423a5c877bcfc.docx]

| **Parameter** | **p-value** | **OR** | **95% CI** |
| --- | --- | --- | --- |
| **NSCLC -related characteristics** | | | |
| Age at NSCLC diagnosis ≥60 years | **0.017** | **0.44** | **0.18-1.04** |
| Female | 0.764 | 0.83 | 0.33-2.07 |
| Not surgical treatment of NSCLC | 0.206 | 0.54 | 0.19-1.56 |
| Adjuvant chemotherapy | **0.016** | **0.55** | **0.29-1.04** |
| Adjuvant NSCLC radiation | 1.000 | 0.87 | 0.35-2.20 |
| Non-adenocarcinoma of NSCLC | **0.037** | **0.32** | **0.08-1.18** |
| Initial T stage ＜T2 | 1.000 | 0.79 | 0.19-3.22 |
| Initial N stage ≥N1 | 0.658 | 0.91 | 0.58-1.43 |
| Initial M stage M1 | 1.000 | 0.98 | 0.23-4.16 |
| ECOG score ＞1 | 1.000 | 0.56 | 0.08-4.22 |
| AJCC stage III—IV | 0.600 | 0.86 | 0.48-1.55 |
| **BM-related characteristics** | | | |
| Age at BM ≥60 years | 0.129 | 0.69 | 0.39-1.22 |
| Preoperative KPS score≥90 | 0.684 | 0.89 | 0.49-1.61 |
| Preoperative WBC (≥10/nl) | 0.282 | 0.33 | 0.05-2.33 |
| Preoperative Hemoglobin (＜12g/dl) | 0.721 | 0.61 | 0.15-2.40 |
| Preoperative Creatinine (≤1.1 mg/dl) | 0.181 | 0.90 | 0.73-1.10 |
| Not pre-existing conditions Arterial hypertension | 1.000 | 0.98 | 0.70-1.38 |
| Not pre-existing conditions Diabetes mellitus | 0.499 | 0.97 | 0.84-1.12 |
| Not preoperative MRI Tumor necrosis | 1.000 | 0.84 | 0.28-2.56 |
| Not preoperative MRI Edema >10mm | 1.000 | 0.84 | 0.28-2.56 |
| Preoperative MRI Midline shift | 1.000 | 0.98 | 0.39-2.51 |
| Number of BM ＞1 | 0.764 | 0.83 | 0.33-2.07 |
| Location of BM | 0.868 |  |  |
| Supratentorial BM vs. Infratentorial BM | 1.000 | 0.71 | 0.09-5.63 |
| Supratentorial BM vs. Supratentorial and infratentorial BM | 0.674 | 0.43 | 0.06-3.11 |
| Supratentorial and infratentorial BM vs. Infratentorial BM | 1.000 | 0.78 | 0.18-3.28 |
| Not adjuvant brain radiation | 0.206 | 0.54 | 0.19-1.56 |
| Adjuvant targeted therapy | **0.000** | **2.27** | **1.70-3.03** |
| Not adjuvant chemotherapy | 0.569 | 0.89 | 0.57-1.39 |
| Not Both adjuvant chemotherapy and brain radiation | 0.569 | 0.89 | 0.57-1.39 |

Abbreviations: NSCLC: Not-small cell Lung cancer, BM: brain metastasis, OR odds ratios, CI: confidence interval; TI time interval，WBC white blood cells，KPS Karnofsky Performance Score， MRI magnetic resonance imaging，T: Tumor size, N: Lymph nodes, M: distant metastasis，AJCC American Joint Committee on Cancer，ECOG Eastern Cooperative Oncology Group score standard.
