# Supplementary material for: The impact of time interval on prognosis in patients with non-small cell lung cancer brain metastases after metastases surgery: a retrospective study
Source: Research Square preprint supplement (doi:10.21203/rs.3.rs-2998928/v1), 2023-06-26
Supplement: Supplementary file 2 [file 210e7e81b42c9a6d1ef62c97.docx]

| **Parameter** | **p-value** | **aOR** | **95% CI** |
| --- | --- | --- | --- |
| **NSCLC-related characteristics** | | | |
| Male | 0.073 | 0.61 | 0.19-1.92 |
| Surgical treatment of NSCLC | 0.601 | 1.43 | 0.37-5.52 |
| Lung adenocarcinoma | 0.120 | 2.91 | 0.76-11.20 |
| Adjuvant chemotherapy | **0.023** | **0.25** | **0.07-0.83** |
| **BM-related characteristics** | | | |
| Preoperative Hemoglobin (≥12g/dl) | 0.082 | 0.25 | 0.05-1.19 |
| Not adjuvant targeted therapy | **0.000** | **0.02** | **0.00-0.16** |

Abbreviations: NSCLC: Not-small cell Lung cancer, BM: brain metastasis, aOR Adjusted odds ratios, CI: confidence interval.
