# Supplementary material for: The impact of time interval on prognosis in patients with non-small cell lung cancer brain metastases after metastases surgery: a retrospective study
Source: Research Square preprint supplement (doi:10.21203/rs.3.rs-2998928/v1), 2023-06-26
Supplement: Supplementary file 3 [file 7a17c9b60045a62ebd470735.docx]

| **Parameter** | **p-value** | **HR** | **95% CI** |
| --- | --- | --- | --- |
| TI <23 months | **0.000** | **7.55** | **3.00-18.99** |
| Male | 0.491 | 1.22 | 0.69-2.16 |
| Age at NSCLC diagnosis ≥60 years | 0.132 | 1.52 | 0.88-2.62 |
| Age at BM ≥60 years | 0.078 | 1.68 | 0.94-3.01 |
| Number of LC >1 | 0.297 | 1.65 | 0.65-4.20 |
| Surgical treatment of NSCLC | **0.034** | **0.54** | **0.31-0.96** |
| Adjuvant chemotherapy | 0.087 | 1.70 | 0.93-3.13 |
| Adjuvant NSCLC radiation | 0.978 | 0.99 | 0.56-1.76 |
| Lung adenocarcinoma | **0.024** | **0.53** | **0.31-0.92** |
| Initial T stage ≥ T2 | 0.211 | 1.60 | 0.77-3.33 |
| Initial N stage N0 | 0.614 | 0.86 | 0.49-1.53 |
| Initial M stage M1 | 0.087 | 1.98 | 0.91-4.30 |
| ECOG score > 1 | 0.239 | 1.58 | 0.74-3.37 |
| AJCC stage III—IV | 0.232 | 1.39 | 0.81-2.40 |
| Preoperative seizures | 0.831 | 0.81 | 0.11-5.87 |
| Preoperative KPS score < 90 | 0.149 | 1.48 | 0.87-2.53 |
| Preoperative WBC (≥10/nl) | 0.649 | 1.18 | 0.57-2.45 |
| Preoperative Hemoglobin (< 12g/dl) | 0.536 | 1.22 | 0.65-2.26 |
| Preoperative Creatinine (> 1.1 mg/dl) | 0.476 | 0.60 | 0.15-2.46 |
| Pre-existing conditions Arterial hypertension | 0.986 | 1.00 | 0.53-1.86 |
| Pre-existing conditions Diabetes mellitus | 0.550 | 0.65 | 0.16-2.68 |
| Preoperative MRI Tumor necrosis | 0.654 | 0.86 | 0.46-1.64 |
| Preoperative MRI Edema >10mm | 0.549 | 0.82 | 0.43-1.57 |
| Preoperative MRI Midline shift | 0.758 | 0.91 | 0.50-1.66 |
| Number of BM >1 | 0.193 | 1.48 | 0.82-2.68 |
| Infratentorial BM | 0.556 | 1.33 | 0.52-3.39 |
| Supratentorial and infratentorial BM | **0.032** | **2.26** | **1.07-4.77** |
| Adjuvant brain radiation | **0.003** | **0.44** | **0.25-0.76** |
| Adjuvant targeted therapy | **＜0.001** | **0.17** | **0.09-0.30** |
| Adjuvant chemotherapy | 0.157 | 0.66 | 0.36-1.18 |
| Both adjuvant chemotherapy and brain radiation | 0.157 | 0.66 | 0.36-1.18 |
| Late occurrence BM patients (≥36 months) | **0.000** | **0.08** | **0.02-0.32** |

Abbreviations: NSCLC: Not-small cell Lung cancer, BM: brain metastasis, T: tumor size, N: lymph nodes, M: distant metastasis, HR: hazard ratio, CI: confidence interval, ECOG Eastern Cooperative Oncology Group score standard, AJCC American Joint Committee on Cancer, KPS: Karnofsky Performance Score, OR: odds ratio, CI: confidence interval.
