# Supplementary material for: The impact of time interval on prognosis in patients with non-small cell lung cancer brain metastases after metastases surgery: a retrospective study
Source: Research Square preprint supplement (doi:10.21203/rs.3.rs-2998928/v1), 2023-06-26
Supplement: Supplementary file 4 [file 83cece44ba1234d7c6babf86.docx]

| Parameter Median (IQR) or No. (%) |
| --- |

| Number of patients 74 (100%)  Gender  Female/male 23(31.1%)/51(68.9%)  Interval NSCLC to BM (months) 19.0(9.0—31.3)  NSCLC characteristics  Age at LC diagnosis (years) 60.0(51.8—64.0)  Surgical treatment of NSCLC 49(66.2%)  Singular/multiple NSCLC 68(91.9%)/6(8.1%)  Systemic treatment of NSCLC  Adjuvant chemotherapy 49(66.2%)  Adjuvant NSCLC radiation 22(29.7%)  Pathological classification of NSCLC  Non-adenocarcinoma of NSCLC 27(36.5%)  Lung adenocarcinoma 47(63.5%)  TNM stage  Initial T stage≥ T2 62(83.8%)  Initial N stage≥ N1 48(64.9%)  Initial M stage M1 10(13.5%)  ECOG score standard  Initial score > 1 8(10.8%)  AJCCC stage  I—II 35(47.3%)  III—IV 39(52.7%)  Clinical characteristics at BM diagnosis  Age at BM diagnosis [years] 62.0(56.0—67.0)  Preoperative seizures 2(2.7%)  Preoperative KPS score (≥90) 38(51.4%)  Preoperative laboratory values  WBC (≥10/nl) 13(17.6%)  Hemoglobin (< 12g/dl) 15(20.3%)  Creatinine (> 1.1 mg/dl) 4(5.4%)  Pre-existing conditions  Arterial hypertension 19(25.7%)  Diabetes mellitus 3(4.1%)  BM characteristics  Preoperative MRI  Tumor necrosis 57(77.0%)  Edema >10mm 57(77.0%)  Midline shift 20(27.0%)  Singular/multiple BM 51(68.9%)/23(31.1%)  Supratentorial/infratentorial/both BM 58(78.4%)/6(8.1%)/10(13.5%)  Adjuvant brain radiation 49(66.2%)  Adjuvant chemotherapy 25(33.8%)  Both adjuvant chemotherapy and brain radiation 25(33.8%)  Adjuvant targeted therapy 41(55.4%) |
| --- |

No. number of cases, IQR interquartile ranges 25%–75%, NSCLC Not-small cell Lung cancer, BM brain metastasis Ttumor size, N lymph nodes, M distant metastasis, G grade of cancer cells, ECOG Eastern Cooperative Oncology Group score standard , AJCC American Joint Committee on Cancer ,KPS Karnofsky Performance Score, WBC white blood cells, MRI magnetic resonance imaging.
