# Supplementary material for: The impact of time interval on prognosis in patients with non-small cell lung cancer brain metastases after metastases surgery: a retrospective study
Source: Research Square preprint supplement (doi:10.21203/rs.3.rs-2998928/v1), 2023-06-26
Supplement: Supplementary file 5 [file aa4eaf76c07adaf7155efb2f.docx]

| **Parameter** | **p-value** | **OR** | **95% CI** |
| --- | --- | --- | --- |
| **NSCLC -related characteristics** | | | |
| Age at NSCLC diagnosis ≥60 years | 0.455 | 0.84 | 0.52-1.35 |
| Male | **0.001** | **0.42** | **0.22-0.80** |
| Not surgical treatment of NSCLC | 0.073 | 0.49 | 0.21-1.15 |
| Adjuvant chemotherapy | **0.004** | **0.57** | **0.36-0.91** |
| Adjuvant NSCLC radiation | 0.191 | 0.58 | 0.24-1.38 |
| Non-adenocarcinoma of NSCLC | 0.064 | 0.34 | 0.13-0.88 |
| Initial T stage ＜T2 | 1.000 | 0.98 | 0.33-2.94 |
| Initial N stage ≥N1 | 0.658 | 0.81 | 0.54-1.20 |
| Initial M stage M1 | 1.000 | 0.84 | 0.24-2.97 |
| ECOG score ＞1 | 0.253 | 0.28 | 0.04-2.15 |
| AJCC stage III—IV | 0.563 | 0.87 | 0.54-1.41 |
| **BM-related characteristics** | | | |
| Age at BM ≥60 years | 0.654 | 0.92 | 0.63-1.34 |
| Preoperative KPS score < 90 | 0.568 | 0.86 | 0.51-1.45 |
| Preoperative WBC (≥10/nl) | 1.000 | 0.87 | 0.30-2.55 |
| Preoperative Hemoglobin (≥12g/dl) | **0.000** | **0.16** | **0.05-0.47** |
| Preoperative Creatinine (≤1.1 mg/dl) | 0.600 | 0.96 | 0.84-1.10 |
| Pre-existing conditions not Arterial hypertension | 0.744 | 0.95 | 0.71-1.28 |
| Pre-existing conditions Diabetes mellitus | 1.000 | 0.98 | 0.93-10.29 |
| Preoperative MRI not Tumor necrosis | 0.308 | 0.60 | 0.22-1.66 |
| Preoperative MRI not Edema >10mm | 0.664 | 0.82 | 0.32-2.06 |
| Preoperative MRI Midline shift | 0.675 | 0.84 | 0.37-1.92 |
| Number of BM ＞1 | 0.347 | 0.69 | 0.31-1.53 |
| Location of BM | 0.118 |  |  |
| Supratentorial BM vs. Infratentorial BM | 0.397 | 0.33 | 0.04-2.69 |
| Supratentorial BM vs. Supratentorial and infratentorial BM | 0.085 | 0.20 | 0.03-1.51 |
| Supratentorial and infratentorial BM vs. Infratentorial BM | 1.000 | 0.78 | 0.18-3.28 |
| Not adjuvant brain radiation | 0.073 | 0.49 | 0.21-1.15 |
| Not adjuvant targeted therapy | **0.000** | **0.06** | **0.01-0.42** |
| Not adjuvant chemotherapy | 0.184 | 0.78 | 0.53-1.16 |
| Not Both adjuvant chemotherapy and brain radiation | 0.184 | 0.78 | 0.53-1.16 |

Abbreviations: NSCLC: Not-small cell Lung cancer, BM: brain metastasis, OR odds ratios, CI: confidence interval; TI time interval，WBC white blood cells，KPS Karnofsky Performance Score， MRI magnetic resonance imaging，T: Tumor size, N: Lymph nodes, M: distant metastasis，AJCC American Joint Committee on Cancer，ECOG Eastern Cooperative Oncology Group score standard.
