# Supplementary material for: The impact of time interval on prognosis in patients with non-small cell lung cancer brain metastases after metastases surgery: a retrospective study
Source: Research Square preprint supplement (doi:10.21203/rs.3.rs-2998928/v1), 2023-06-26
Supplement: Supplementary file 6 [file ad514d1851fa121bd029b82a.docx]

| **Parameter** | **p-value** | **aOR** | **95% CI** |
| --- | --- | --- | --- |
| **NSCLC -related characteristics** | | | |
| Age at NSCLC diagnosis ≥60 years | **0.011** | **7.24** | **1.59-32.95** |
| Adjuvant chemotherapy | **0.011** | **6.46** | **1.52-27.43** |
| Non-adenocarcinoma of NSCLC | 0.132 | 3.72 | 0.67-20.52 |
| **BM -related characteristics** | | | |
| Adjuvant targeted therapy | **0.000** | **2.27** | **1.70-3.03** |

Abbreviations: NSCLC: Not-small cell Lung cancer, BM: brain metastasis, aOR Adjusted odds ratios, CI: confidence interval.
