# Supplementary material for: The impact of time interval on prognosis in patients with non-small cell lung cancer brain metastases after metastases surgery: a retrospective study
Source: Research Square preprint supplement (doi:10.21203/rs.3.rs-2998928/v1), 2023-06-26
Supplement: Supplementary file 7 [file adaba3a52f88f7eb9c634a17.docx]

| **Parameter** | **p-value** | **aHR** | **95% CI** |
| --- | --- | --- | --- |
| TI <23 months | **0.045** | **2.87** | **1.03-8.02** |
| Age at BM ≥60 years | **0.035** | **2.51** | **1.07-5.92** |
| Surgical treatment of NSCLC | 0.990 | 0.99 | 0.42-2.37 |
| NSCLC Adjuvant chemotherapy | 0.352 | 0.66 | 0.27-1.59 |
| Lung adenocarcinoma | 0.457 | 0.76 | 0.36-1.58 |
| Initial M stage M1 | **0.043** | **2.80** | **1.04-7.59** |
| Location of BM | 0.479 |  |  |
| infratentorial BM vs. Supratentorial BM | 0.270 | 1.77 | 0.64-4.89 |
| Supratentorial and infratentorial BM vs. Supratentorial BM | 0.515 | 1.32 | 0.57-3.08 |
| Adjuvant brain radiation | **0.047** | **0.50** | **0.25-0.99** |
| Adjuvant targeted therapy of BM | **0.000** | **0.15** | **0.06-0.35** |
| Late occurrence BM patients (≥36 months) | 0.098 | 0.22 | 0.37-1.32 |

Abbreviations: NSCLC: Not-small cell Lung cancer, BM: brain metastasis, M: distant metastasis, OS: overall survival, aHR: adjusted hazard ratio, CI: confidence interval; TI time interval.
