# Supplementary material for: The impact of time interval on prognosis in patients with non-small cell lung cancer brain metastases after metastases surgery: a retrospective study
Source: Research Square preprint supplement (doi:10.21203/rs.3.rs-2998928/v1), 2023-06-26
Supplement: Supplementary file 8 [file ae20e0bd1ecdbc2dd2ff2e51.docx]

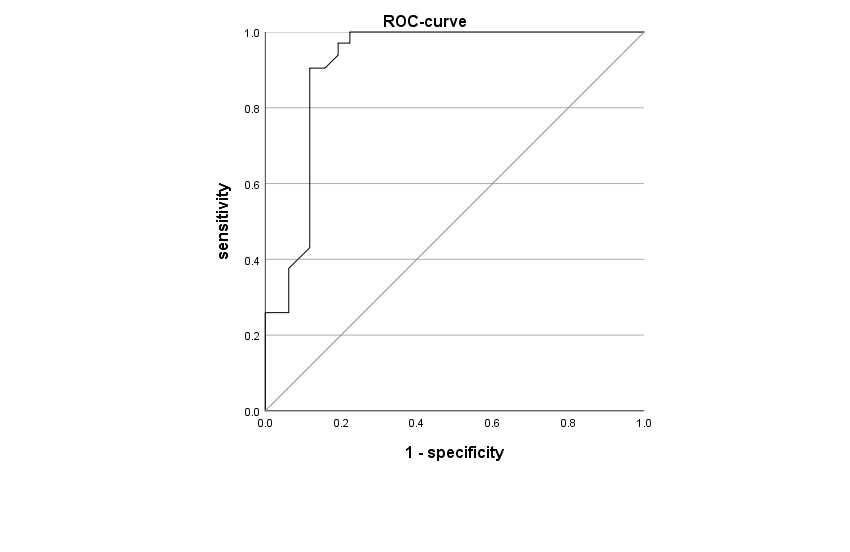


Abbreviations:TI: time interval, AUC: Areas under the curve, ROC: Receiver operating characteristic
